# Supplementary material
Source: Royal Society of Chemistry journal article supplement (doi:10.1039/d6ob00487c)

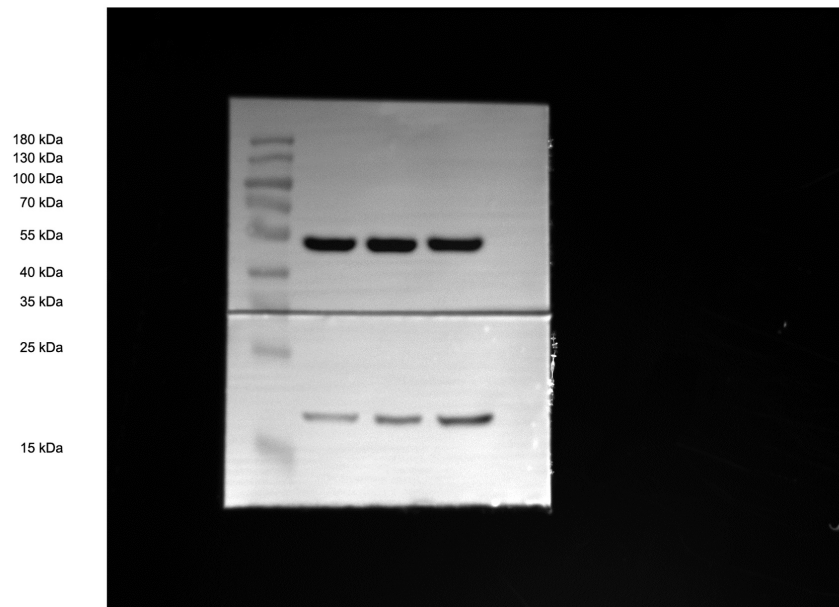

$\beta$ -tubulin

Cleaved Caspase 3

180 kDa  
130 kDa  
100 kDa  
70 kDa  
55 kDa  
40 kDa  
35 kDa  
25 kDa  
15 kDa

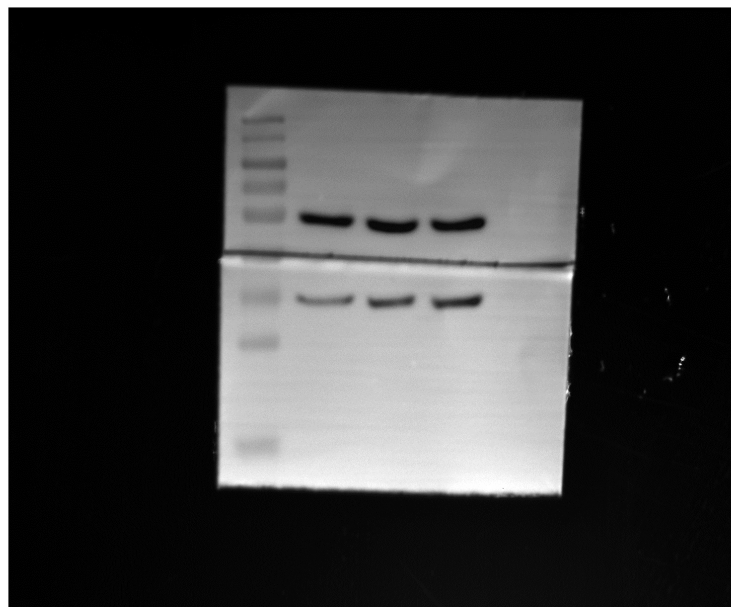

$\beta$ -tubulin

Cleaved Caspase-9

Supplement: d6ob00487c1.pdf [file d6ob00487c1.pdf]
